# Supplementary material for: Urea based organic nanoparticles for selective determination of NADH
Source: Royal Society of Chemistry journal article supplement (doi:10.1039/c4ra10209f), 2014-11-12
Supplement: c4ra10209f1.pdf [file c4ra10209f1.pdf]

**Supporting Information**

**Urea based organic nanoparticles for selective determination of NADH**

Jasminder Singh, Amanpreet Singh and Narinder Singh\*

Department of Chemistry

Indian Institute of Technology Ropar (IIT Ropar)

Rupnagar, Panjab, India, 140001

Tel: 91- 1881242176

E-mail: [nsingh@iitrpr.ac.in](mailto:nsingh@iitrpr.ac.in)

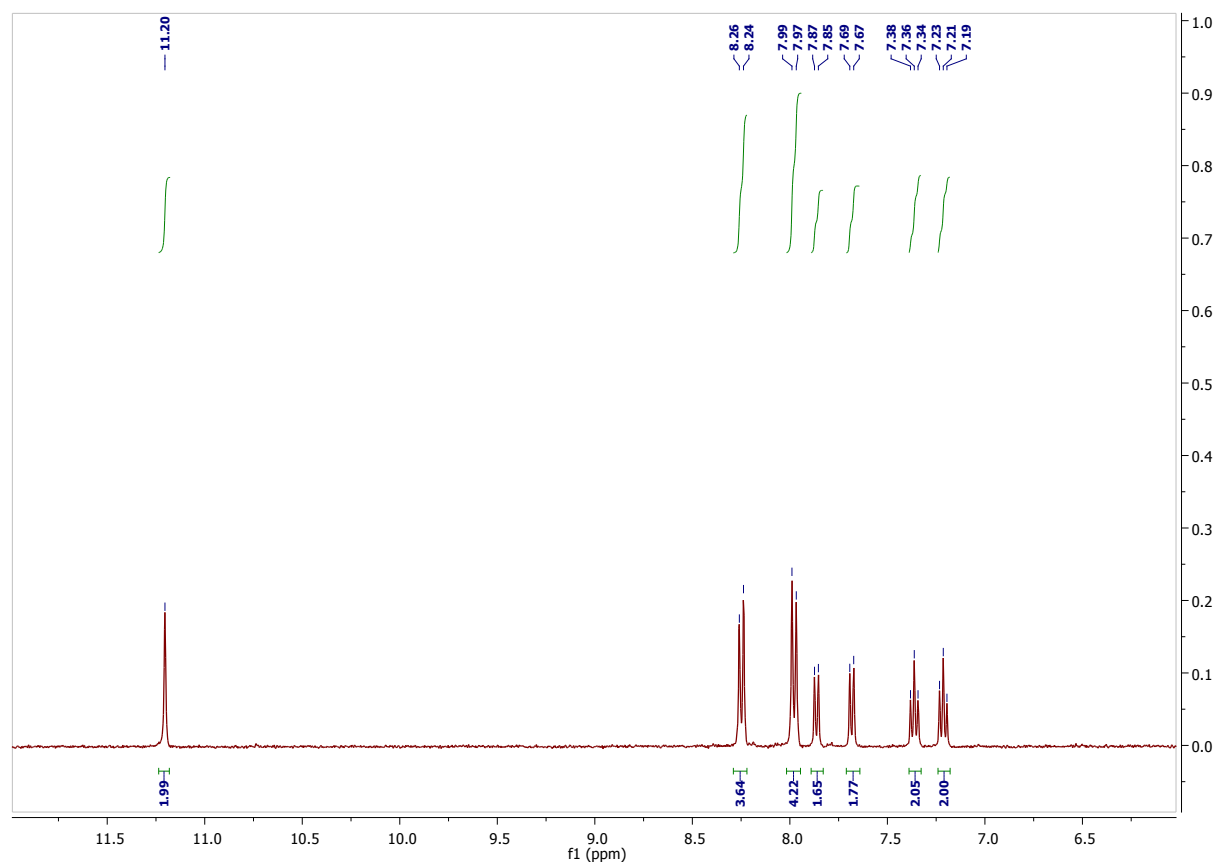

Figure S1. <sup>1</sup>H NMR spectrum of receptor **1**

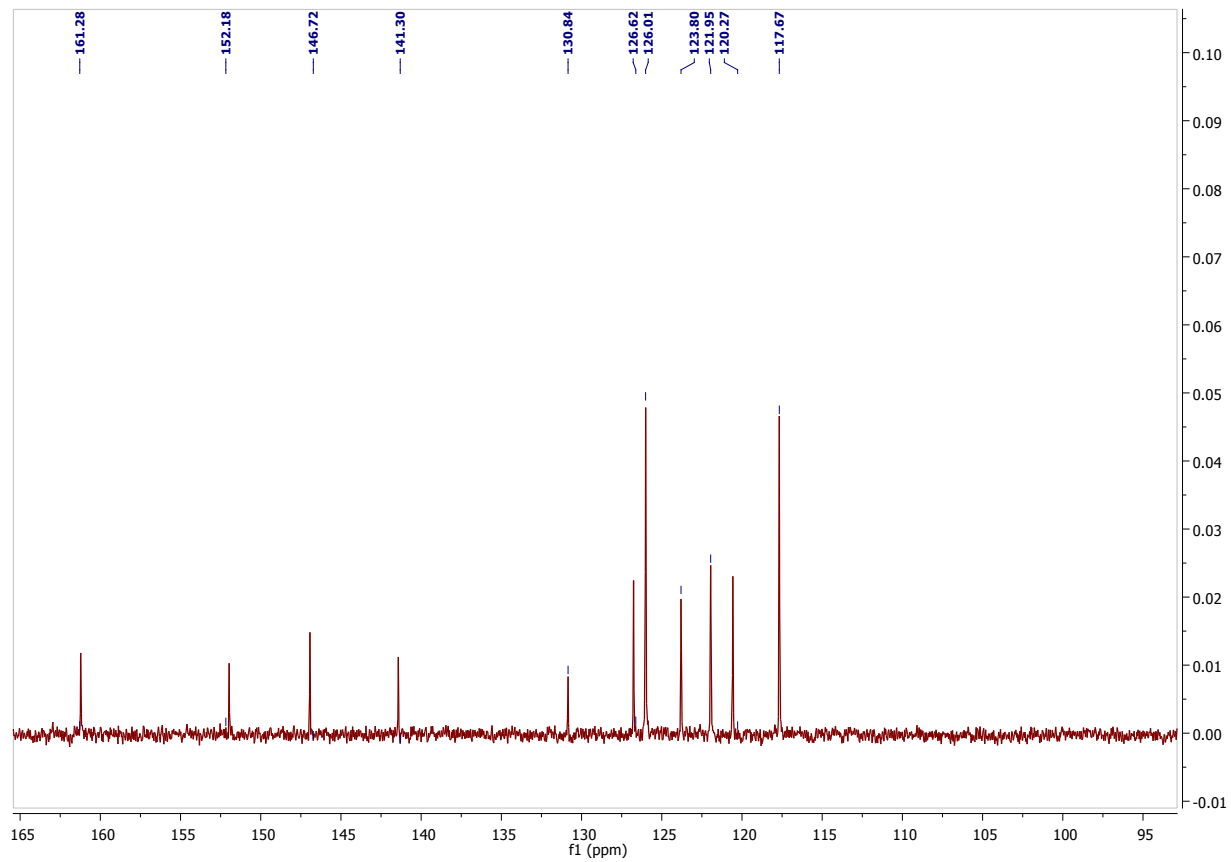

Figure S2.  $^{13}\text{C}$  NMR spectrum of receptor **1**

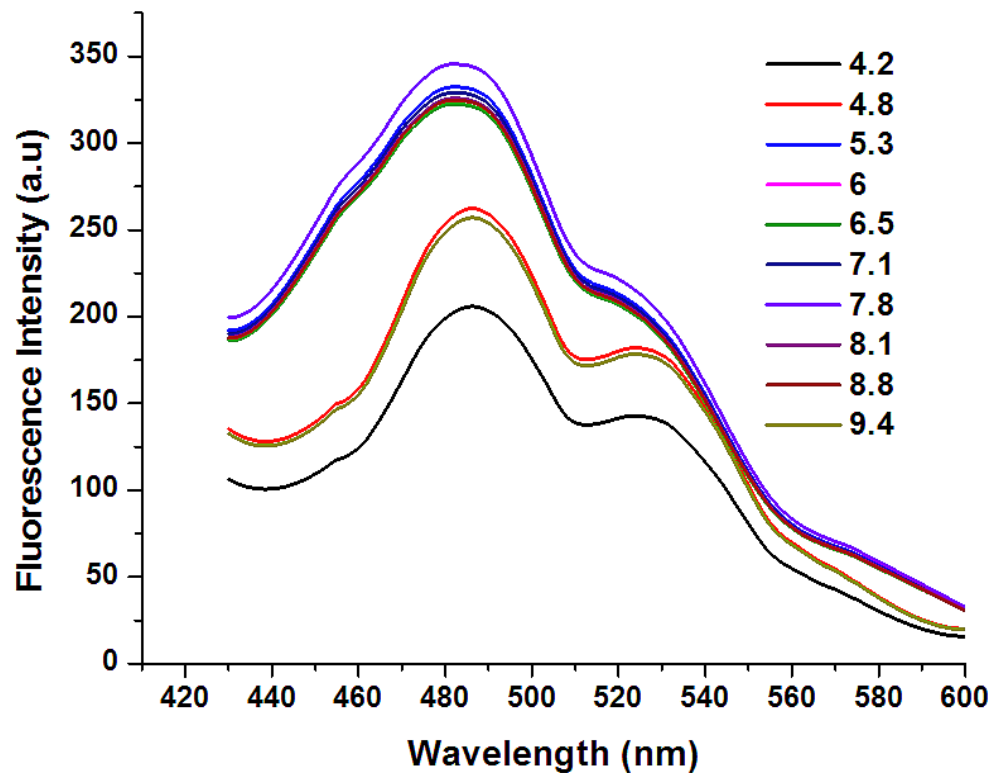

Figure S3. Effect of pH on nano-aggregates of receptor **1**

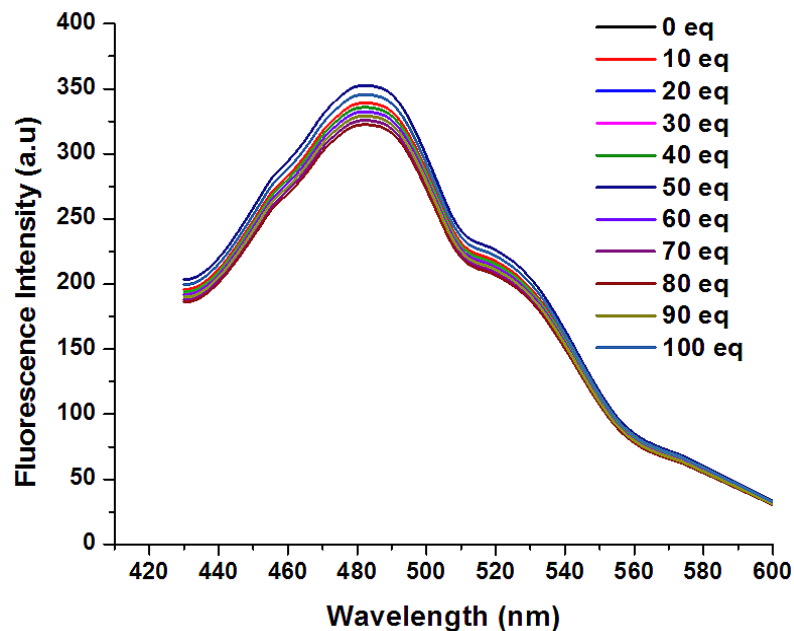

Figure S4. Effect of ionic strength on nanoaggregates of receptor **1**, upon addition of 0- 100 equiv. of TBA salt of perchlorate

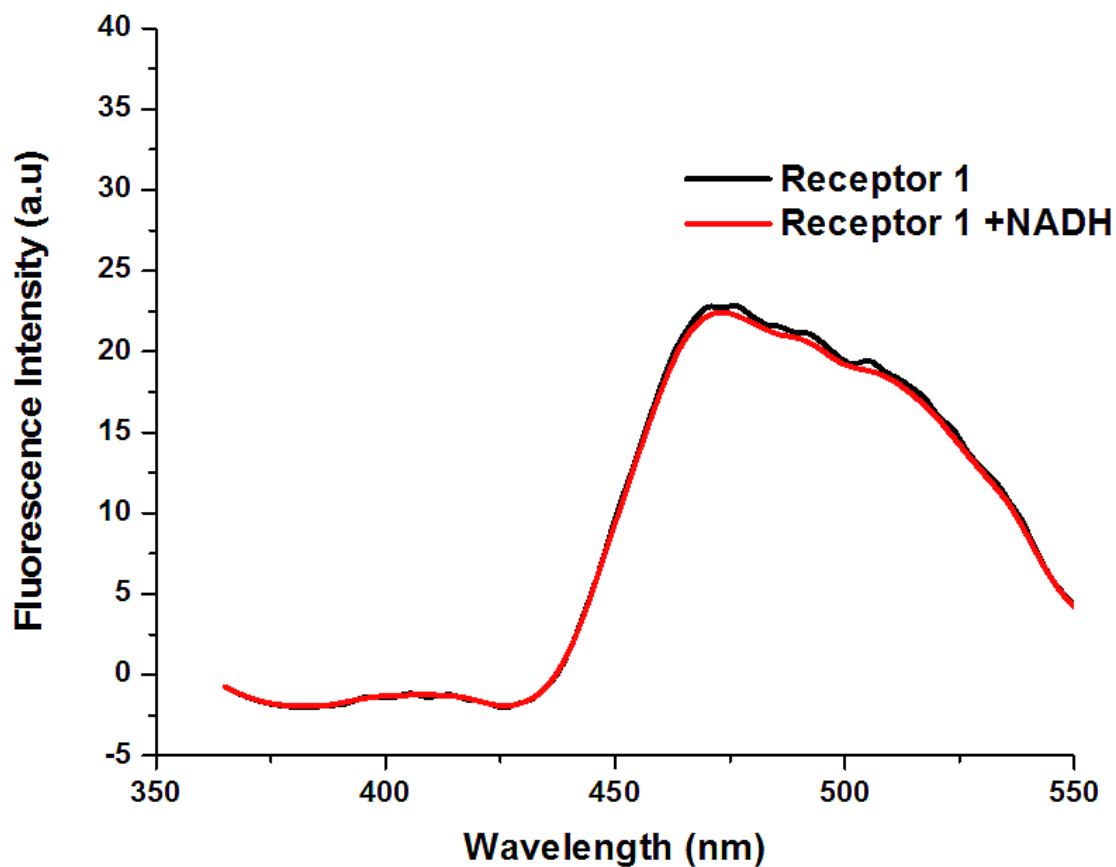

Figure S5: Binding study of Receptor **1** with NADH

Table S1: Comparison of Reported sensor with its contemporary sensors reported in literature

| S. No. | Sensor                                                          | Method          | Detection range       | Detection limit    | Reference |
|--------|-----------------------------------------------------------------|-----------------|-----------------------|--------------------|-----------|
| 1.     | PEDOP/MWCNTs-Pd/GCE                                             | Electrochemical | 1-13000 $\mu\text{M}$ | 0.18 $\mu\text{M}$ | 1         |
| 2.     | Graphite/poly(methylmethacrylate) composite electrode           | Electrochemical | 4-5600 $\mu\text{M}$  | 3.5 $\mu\text{M}$  | 2         |
| 3.     | Co <sub>3</sub> O <sub>4</sub> nanosheet modified electrode     | Electrochemical | 1-30 $\mu\text{M}$    | 4.25 $\mu\text{M}$ | 3         |
| 4.     | PEDOT-PSS-Aunano electrode                                      | Electrochemical | 1-80 $\mu\text{M}$    | 0.1 $\mu\text{M}$  | 4         |
| 5.     | Nile-blue-functionalized CdSe/ZnS quantum dots                  | Fluorescence    | -                     | -                  | 5         |
| 6.     | Phenyl Phenyl boronic acid-functionalized CdSe/ZnS quantum dots | Fluorescence    | -                     | 0.1 nM             | 6         |

|    |                                              |                     |                 |              |                      |
|----|----------------------------------------------|---------------------|-----------------|--------------|----------------------|
| 7. | Fluorescein mercury acetate (FMA) derivative | Fluorescence        | -               | 0.1 $\mu$ M  | 7                    |
| 8. | <b>Urea based Organic nanoparticles</b>      | <b>Fluorescence</b> | <b>0-340 nm</b> | <b>96 nM</b> | <b>Proposed work</b> |

1. J. M. You and S. W. Jeon, *Electrochim. Acta*, 2011, 56, 10077– 10082.
2. H. Dai, H. F. Xu, Y. Y. Lin, X. P. Wu and G. N. Chen, *Electrochem. Commun.*, 2009, 11, 343–346.
3. C. H. Chen, Y. C. Chen and M. S. Lin, *Biosens. Bioelectron.*, 2013, 42, 379–384.
4. K. M. Manesh, P. Santhosh, A. Gopalan and K. P. Lee, *Talanta*, 2008, 75, 1307–1314.
5. Ronit Freeman, Ron Gill, Itzhak Shweky, Moshe Kotler, Uri Banin, and Itamar Willner *Angew. Chem. Int. Ed.* 2009, 48, 309 –313.
6. R. Freeman and I. Willner, *Nano Lett.*, 2009, 9, 322
7. S. O. Jung, J. Y. Ahn, S. Kim, S. Yi, M. H. Kim, H. H. Jang, S. H. Seo, M. S. Eomb, S. K. Kim, D. H. Ryu, S.-K. Chang and M. S. Han, *Tetrahedron Lett.*, 2010, 51, 3775–3778.
